# Supplementary material
Source: publisher figshare collection journal article supplement (https://karger.figshare.com/articles/dataset/_/3492620)
Supplement: Supplementary file 1 [file 1]

Table 1

|  | Prior OAT  n = 809 | No prior OAT  n = 2 915 | *P* value |
| --- | --- | --- | --- |
| Mean age (years) ± SD | 76.8 ± 9.9 | 71.5 ± 14.0 | < .001 |
| Female sex | 353 (43.6 %) | 1 420 (48.7 %) | .01 |
| Known AF | 147 (18.2 %) | 402 (13.8 %) | .002 |
| Known hypertension | 134 (16.6 %) | 339 (11.6 %) | < .001 |
| Known diabetes | 295 (36.5 %) | 737 (25.3 %) | < .001 |

Patient characteristics of acute intracerebral hemorrhage patients admitted 2012 – 2014 within 24 h of symptom onset with or without active OAT (VKA or NOAC) upon admission.
